# Supplementary material for: REGAIN STUDY: Retrospective Study to Assess the Effectiveness, Tolerability, and Safety of Ferric Carboxymaltose in the Management of Iron Deficiency Anemia in Pregnant Women
Source: Hindawi journal article supplement (doi:10.1155/2019/4640635), 2019-11-12
Supplement: f1 [file 4640635.f1.pdf]

# 1 Supplementary Materials

## 2 Listing of Concomitant Medications

| 7                           | -Frequency | -Percent |
|-----------------------------|------------|----------|
| Metformin                   | 68         | 19.54    |
| Levothyroxine               | 67         | 19.25    |
| Ferrous Sulfate/Folic acid  | 33         | 9.48     |
| Multivitamins               | 22         | 6.32     |
| Insulin                     | 15         | 4.31     |
| Insulin Detemir             | 11         | 3.16     |
| Vitamin D                   | 11         | 3.16     |
| Budesonide/Formoterol       | 9          | 2.59     |
| Ferrous sulfate             | 9          | 2.59     |
| Insulin Aspart              | 5          | 1.44     |
| Labetalol                   | 5          | 1.44     |
| Salbutamol                  | 5          | 1.44     |
| Chlorphenamine              | 4          | 1.15     |
| Metformin XR                | 4          | 1.15     |
| Acetylsalicylic acid        | 3          | 0.86     |
| Al/Mg hydroxide             | 3          | 0.86     |
| Albuterol                   | 3          | 0.86     |
| Calcium                     | 3          | 0.86     |
| Enoxaparin sodium           | 3          | 0.86     |
| Ergocalciferol              | 3          | 0.86     |
| Hydrocortisone              | 3          | 0.86     |
| Prednisolone                | 3          | 0.86     |
| Ranitidine                  | 3          | 0.86     |
| Amitriptyline               | 2          | 0.57     |
| Azathioprine                | 2          | 0.57     |
| Bisoprolol                  | 2          | 0.57     |
| Folic acid                  | 2          | 0.57     |
| Hydroxychloroquine          | 2          | 0.57     |
| Levetiracetam               | 2          | 0.57     |
| Methyldopa                  | 2          | 0.57     |
| Sertraline                  | 2          | 0.57     |
| Amoxicillin/Clavulanic acid | 1          | 0.29     |
| Ampicillin                  | 1          | 0.29     |
| Azithromycin                | 1          | 0.29     |
| Betamethasone               | 1          | 0.29     |
| Budesonide                  | 1          | 0.29     |
| Cabergoline                 | 1          | 0.29     |
| Calcium/Vitamin D           | 1          | 0.29     |
| Carbamazepine               | 1          | 0.29     |

| 7                    | -Frequency | -Percent     |
|----------------------|------------|--------------|
| Carbimazole          | 1          | 0.29         |
| Cefixime             | 1          | 0.29         |
| Ceftriaxone          | 1          | 0.29         |
| Clonazepam           | 1          | 0.29         |
| Clotrimazole         | 1          | 0.29         |
| Cyanocobalamin       | 1          | 0.29         |
| Cyclobenzaprine      | 1          | 0.29         |
| Ferrous fumarate     | 1          | 0.29         |
| Fluticasone          | 1          | 0.29         |
| Furosemide           | 1          | 0.29         |
| Gabapentin           | 1          | 0.29         |
| Insulin glargine     | 1          | 0.29         |
| Ipratropium          | 1          | 0.29         |
| Lamotrigine          | 1          | 0.29         |
| Mesalazine           | 1          | 0.29         |
| Metronidazole        | 1          | 0.29         |
| Montelukast          | 1          | 0.29         |
| Nitrofurantoin       | 1          | 0.29         |
| Nitrofurantoin XR    | 1          | 0.29         |
| Olanzapine           | 1          | 0.29         |
| Omeprazole           | 1          | 0.29         |
| Oseltamivir          | 1          | 0.29         |
| Progesterone         | 1          | 0.29         |
| Quetiapine           | 1          | 0.29         |
| Sulfasalazine        | 1          | 0.29         |
| Tacrolimus           | 1          | 0.29         |
| Tinzaparin sodium    | 1          | 0.29         |
| Topiramate           | 1          | 0.29         |
| Ursodeoxycholic acid | 1          | 0.29         |
| <b>Total</b>         | <b>348</b> | <b>100.0</b> |
